# Supplementary material for: Fully Automatic Coronary Calcium Score Software Empowered by Artificial Intelligence Technology: Validation Study Using Three CT Cohorts
Source: PubMed Central journal article supplement — Korean J Radiol. 2021 Jul 26;22(11):1764–76. doi: 10.3348/kjr.2021.0148 (PMC8546141; doi:10.3348/kjr.2021.0148), 2021-07-26
Supplement: kjr-22-1764-s001.pdf [file kjr-22-1764-s001.pdf]

## SUPPLEMENT

**Supplementary Table 1. Comparison of Studies of Methods Designed for Automatic Calcium Scoring in CT**

| Study                         | Sensitivity (%),<br>Per-Lesion | False-Positives<br>Per CT Scan | ICC               | Number of CT<br>Scans for Test | Protocol of CT Scan                               | Method of Detection                                                                                                                              |
|-------------------------------|--------------------------------|--------------------------------|-------------------|--------------------------------|---------------------------------------------------|--------------------------------------------------------------------------------------------------------------------------------------------------|
| Isgum et al. 2007 [1]         | 73.8                           | 0.1                            | NA                | 76                             | ECG-gated CT                                      | Feature extraction + classification (k-NN)                                                                                                       |
| Kurkure et al. 2010 [2]       | 92.3                           | NA                             | NA                | 105                            | Electron-beam CT                                  | Feature extraction + two-stage classifier                                                                                                        |
| Bruner et al. 2010 [3]        | 85.6*                          | NA                             | NA                | 30                             | Electron-beam CT                                  | Atlas based approach (coronary artery regions)                                                                                                   |
| Shahzad et al. 2013 [4]       | 86.6                           | 2.2                            | NA                | 157                            | ECG-gated CT                                      | Feature based method + multi-atlas approach with 10 atlas images                                                                                 |
| Wolterink et al. 2015 [5]     | 87*                            | 4.1 mm <sup>3</sup> /image     | 0.93              | 530                            | ECG-gated CT                                      | Feature based two classifiers, one for distinguishing calcifications and negatives and the other for assigning location                          |
| Wolterink et al. 2016 [6]     | 79                             | 0.2                            | 0.96              | 530                            | ECG-gated CT                                      | 2.5D patch-based CNN (15 or 25 sizes from axial, coronal, sagittal plane)                                                                        |
| Lessmann et al. 2018 [7]      | 91.2                           | 40.7 mm <sup>3</sup> /scan     | NA                | 506                            | Non-ECG-gated chest CT                            | Cascaded two 2.5D CNNs (CNN1 with large receptive field and CNN2 with smaller receptive field)                                                   |
| Cano-Espinosa et al. 2018 [8] | NA                             | NA                             | 0.93 <sup>†</sup> | 1000                           | Non-ECG-gated chest CT                            | CNN based regression model, which directly predicts CAC score                                                                                    |
| Martin et al. 2020 [9]        | 93.2 <sup>‡</sup>              | NA                             | 0.985             | 511                            | ECG-gated CT                                      | Two-fold deep-learning models, first one to exclude aorta, aortic valve, mitral valve regions and second one to classify coronary calcium voxels |
| van Velzen et al. 2020 [10]   | 93                             | 4 mm <sup>3</sup> /scan        | 0.99              | 529                            | ECG-gated CT<br>Non-ECG-gated chest CT (n = 3811) | Same as Lessmann et al. 2018 [7]                                                                                                                 |
| Proposed                      | 93.3                           | 0.11                           | 0.99              | 2985                           | ECG-gated CT                                      | 3D patch-based CNN for semantic segmentation                                                                                                     |

\*Volume analysis, <sup>†</sup>Pearson correlation coefficient, <sup>‡</sup>Per-patient sensitivity. CNN = convolutional neural network, D = dimensional, ECG = electrocardiogram, ICC = intraclass correlation coefficient, k-NN = k-nearest neighbor classifier

## REFERENCES

- Isgum I, Rutten A, Prokop M, van Ginneken B. Detection of coronary calcifications from computed tomography scans for automated risk assessment of coronary artery disease. *Med Phys* 2007;34:1450-1461
- Kurkure U, Chittajallu DR, Brunner G, Le YH, Kakadiaris IA. A supervised classification-based method for coronary calcium detection in non-contrast CT. *Int J Cardiovasc Imaging* 2010;26:817-828
- Brunner G, Chittajallu DR, Kurkure U, Kakadiaris IA. Toward the automatic detection of coronary artery calcification in non-contrast computed tomography data. *Int J Cardiovasc Imaging* 2010;26:829-838
- Shahzad R, van Walsum T, Schaap M, Rossi A, Klein S, Weustink AC, et al. Vessel specific coronary artery calcium scoring: an automatic system. *Acad Radiol* 2013;20:1-9
- Wolterink JM, Leiner T, Takx RA, Viergever MA, Isgum I. Automatic coronary calcium scoring in non-contrast-enhanced ECG-triggered cardiac CT with ambiguity detection. *IEEE Trans Med Imaging* 2015;34:1867-1878
- Wolterink JM, Leiner T, de Vos BD, van Hamersvelt RW, Viergever MA, Işgum I. Automatic coronary artery calcium scoring in cardiac CT angiography using paired convolutional neural networks. *Med Image Anal* 2016;34:123-136
- Lessmann N, van Ginneken B, Zreik M, de Jong PA, de Vos BD, Viergever MA, et al. Automatic calcium scoring in low-dose chest CT using deep neural networks with dilated convolutions. *IEEE Trans Med Imaging* 2018;37:615-625
- Cano-Espinosa C, González G, Washko GR, Cazorla M, Estépar RSJ. Automated Agatston score computation in non-ECG gated CT scans using deep learning. *Proc SPIE Int Soc Opt Eng* 2018;10574:105742K
- Martin SS, van Assen M, Rapaka S, Hudson HT Jr, Fischer AM, Varga-Szemes A, et al. Evaluation of a deep learning-based automated CT coronary artery calcium scoring algorithm. *JACC Cardiovasc Imaging* 2020;13:524-526
- van Velzen SGM, Lessmann N, Velthuis BK, Bank IEM, van den Bongard DHJG, Leiner T, et al. Deep learning for automatic calcium scoring in CT: validation using multiple cardiac CT and chest CT protocols. *Radiology* 2020;295:66-79
