# Supplementary material for: Fully Automatic Coronary Calcium Score Software Empowered by Artificial Intelligence Technology: Validation Study Using Three CT Cohorts
Source: PubMed Central journal article supplement — Korean J Radiol. 2021 Jul 26;22(11):1764–76. doi: 10.3348/kjr.2021.0148 (PMC8546141; doi:10.3348/kjr.2021.0148), 2021-07-26
Supplement: kjr-22-1764-s002.pdf [file kjr-22-1764-s002.pdf]

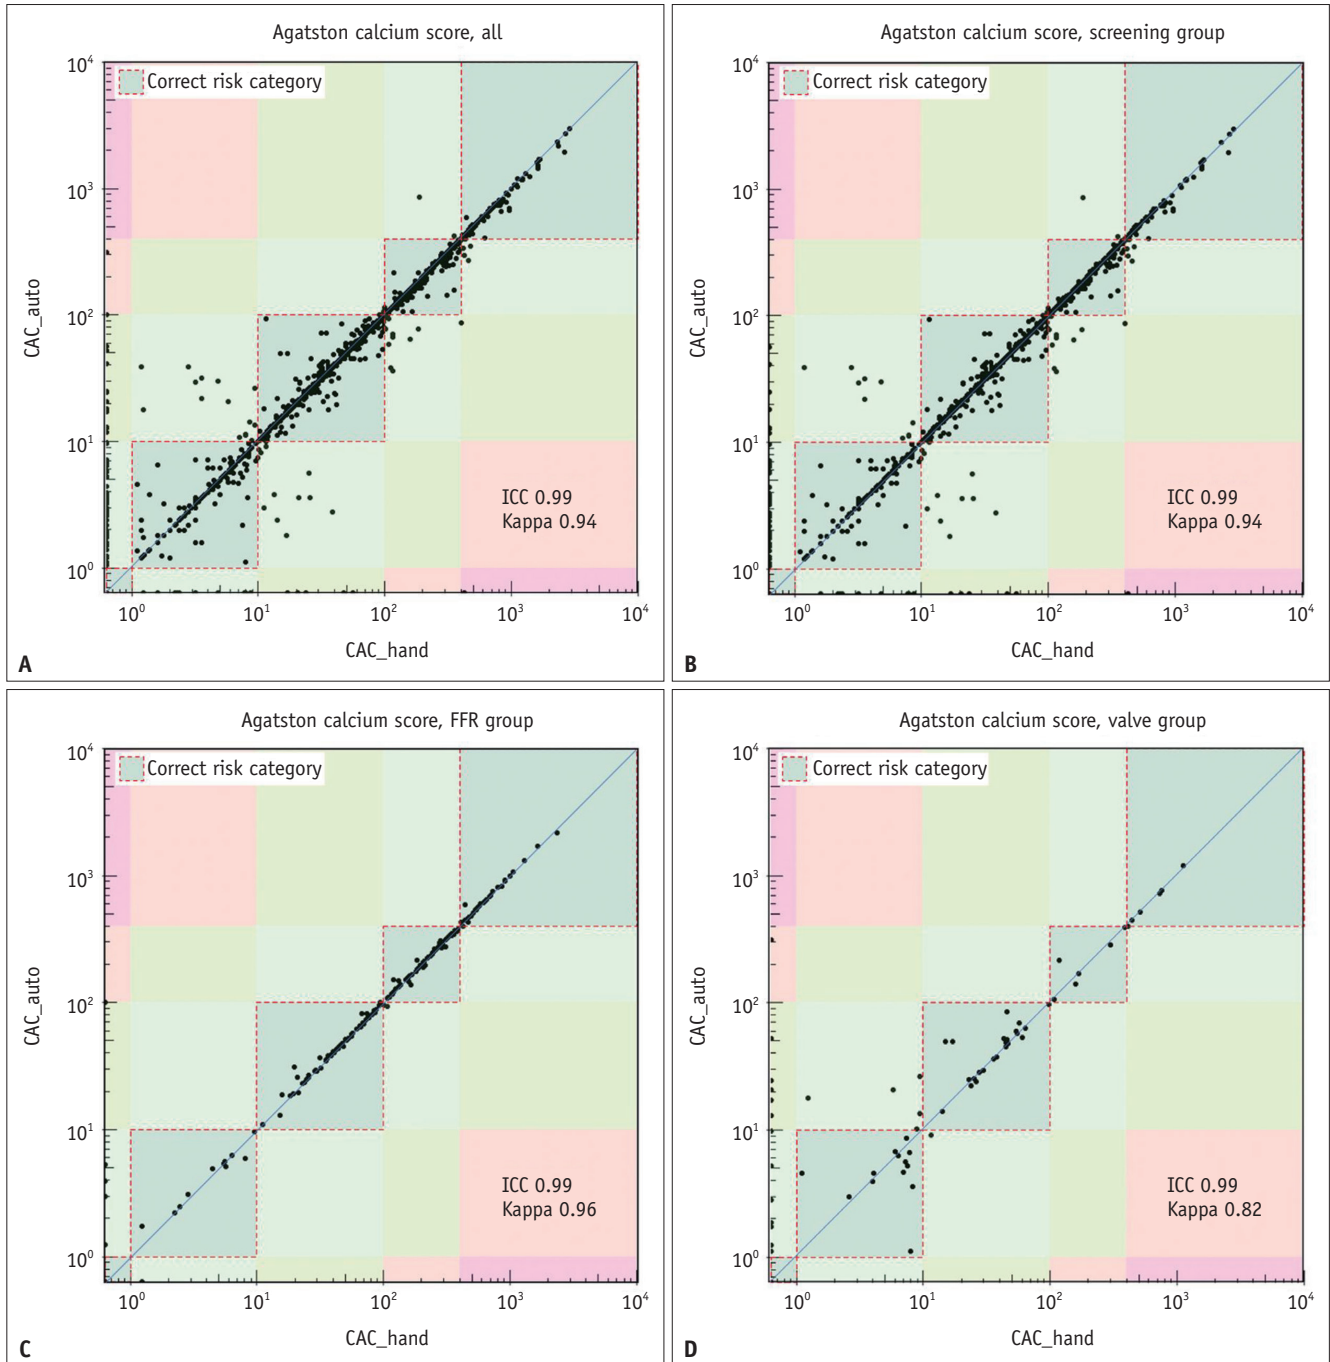

**Supplementary Fig. 1. Scatter plots showing the correlation between manual CAC scoring (CAC\_hand) and automatic CAC scoring (CAC\_auto).**

**A.** All patients. **B.** Screening group. **C.** FFR group. **D.** Valvular heart disease (valve) group. Note that the X- and Y-axes are on the logarithmic scale. The color-coded areas in the graph indicate risk categories (0, 1–10, 11–100, 101–400, > 400) according to the calcium score. The red-dotted boxes indicate the areas where the risk categories classified by CAC\_hand and CAC\_auto match exactly. CAC\_auto = automatic coronary artery calcium scoring, CAC\_hand = manually segmented coronary calcium scoring, FFR = fractional flow reserve, ICC = intraclass correlation coefficient
